# Supplementary material
Source: publisher site journal article supplement (https://www.dovepress.com/get_supplementary_file.php?f=271222.docx)
Supplement: Supplementary file 1 [file get_supplementary_file.php]

**Table S1 Gene list for the customized multigene panel related to dementia**

| **Gene** | **Locus** | **Ref sequence** | **MIM** | **Gene** | **Locus** | **Ref sequence** | **MIM** | **Gene** | **Locus** | **Ref sequence** | **MIM** | **Gene** | **Locus** | **Ref sequence** | **MIM** |
| --- | --- | --- | --- | --- | --- | --- | --- | --- | --- | --- | --- | --- | --- | --- | --- |
| ABCD1 | Xq28 | NM_000033 | 300371 | HFE | 6p22.2 | NM_000410.3 | 613609 | PICALM | 11q14.2 | NM_007166.3 | 603025 | EIF2B3 | 1p34.1 | NM_020365.5 | 606273 |
| ITM2B | 13q14.2 | NM_021999.3 | 603904 | ALDH3A2 | 17p11.2 | NM_000382.3 | 609523 | GRN | 17q21.31 | NM_002087.3 | 138945 | PLD3 | 19q13.2 | NM_012268.3 | *PLD3* |
| PSEN2 | 1q42.13 | NM_000447.2 | 600759 | EIF2B2 | 14q24.3 | NM_014239 | 606454 | EIF2B5 | 3q27.1 | NM_003907.3 | 603945 | MS4A4E | 11q12.2 | NM_001351235.1 | 608401 |
| MPO | 17q22 | NM_000250 | 606989 | GJC2 | 1q42.13 | NM_020435 | 608803 | DARS2 | 1q25.1 | NM_018122.5 | 610956 | NOS3 | 7q36.1 | NM_000603.5 | 163729 |
| GBA | 1q22 | NM_001005741.2 | 606463 | APBB2 | 4p14-p13 | NM_004307.2 | 602710 | CST3 | 20p11.21 | NM_000099.4 | 604312 | SORL1 | 11q24.1 | NM_003105.5 | 602005 |
| ABCA7 | 19p13.3 | NM_019112.3 | 605414 | EIF2B1 | 12q24.31 | NM_001414 | 606686 | CLCN2 | 3q27.1 | NM_004366.6 | 600570 | HEPACAM | 11q24.2 | NM_152722.5 | 611642 |
| AARS2 | 6p21.1 | NM_020745.4 | 612035 | MAPT | 17q21.31 | NM_001123066.3 | 157140 | MLC1 | 22q13.33 | NM_015166.4 | 605908 | APP | 21q21.3 | NM_000484.3 | 104760 |
| SNCA | 4q22.1 | NM_000345.3 | 163890 | CYP27A1 | 2q35 | NM_000784.4 | 606530 | PAXIP1 | 7q36.2 | NM_007349.4 | 608254 | PSEN1 | 14q24.2 | NM_000021.3 | 104311 |
| TUBB4A | 602662 | NM_006087.4 | 602662 | TREM2 | 6p21.1 | NM_018965.3 | 605086 | PLP1 | Xq22.2 | NM_000533.5 | 300401 | CLU | 8p21.1 | NM_001831.3 | 185430 |
| TARDBP | 1p36.22 | NM_007375 | 605078 | GALC | 14q31.3 | NM_000153.4 | 606890 | TBK1 | 12q14.2 | NM_013254.4 | 604834 | ARSA | 22q13.33 | NM_000487.6 | 607574 |
| SNCB | 5q35.2 | NM_003085.5 | 602569 | CD33 | 19q13.41 | NM_001772.3 | 159590 | PRNP | 20p13 | NM_000311.4 | 176640 | HTRA1 | 10q26.13 | NM_002775 | 602194 |
| POLR3B | 12q23.3 | NM_018082.6 | 614366 | CHMP2B | 3p11.2 | NM_014043.3 | 609512 | EIF2B4 | 2p23.3 | NM_001034116.1 | 606687 | PLAU | 10q22.2 | NM_002658.5 | 191840 |
| ADAM10 | 15q21.3 | NM_001110.4 | 602192 | BLMH | 17q11.2 | NM_000386 | 602403 | NOTCH3 | 19p13.12 | NM_000435.3 | 600276 | CR1 | 1q32.2 | NM_000651.4 | 120620 |
| PYCR2 | 1q42.12 | NM_013328.4 | 616406 | POLR1C | 6p21.1 | NM_203290.4 | 610060 | SQSTM1 | 5q35.3 | NM_003900.5 | 601530 | MS4A6A | 11q12.2 | NM_152852.2 | 606548 |
| GFAP | 17q21.31 | NM_002055.5 | 137780 | FUS | 16p11.2 | NM_004960 | 137070 | CD2AP | 6p12.3 | NM_012120.2 | 604241 | UBQLN2 | Xp11.21 | NM_013444 | 300264 |
| LMNB1 | 5q23.2 | NM_005573.4 | 150340 | A2M | 12p13.31 | NM_000014.5 | 103950 | CHCHD10 | 22q11.23 | NM_213720.2 | 615903 | ACE | 17q23.3 | NM_000789.4 | 106180 |
| CSF1R | 5q32 | NM_001288705.3 | 164770 | BIN1 | 2q14.3 | NM_139343.2 | 601248 | PSAP | 10q22.1 | NM_002778.4 | 176801 | APOE | 19q13.32 | NM_000041.4 | 107741 |
| POLR3A | 10q22.3 | NM_007055 | 614258 | C9orf72 | 9p21.2 | NM_018325.5 | 614260 | FA2H | 16q23.1 | NM_024306.5 | 611026 | GBE1 | 3p12.2 | NM_000158 | 607839 |
| GSN | 9q33.2 | NM_198252.3 | 137350 |  |  |  |  |  |  |  |  |  |  |  |  |
